# Supplementary material
Source: Springer Nature journal article supplement (https://www.springermedizin.de/resource/supplementary/13058_2013_3363_MOESM1_ESM.pdf/9703954)
Supplement: MOESM1 [file 9703954]

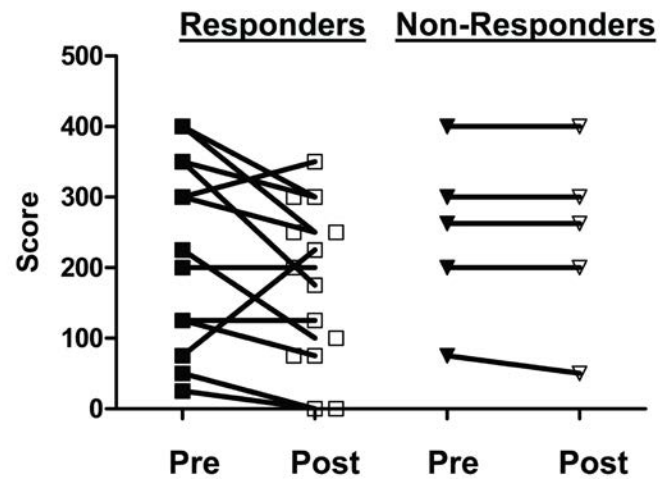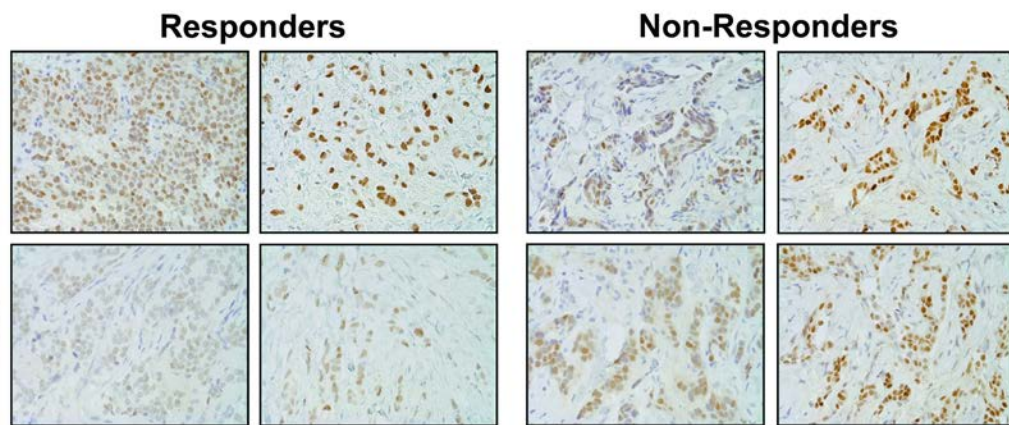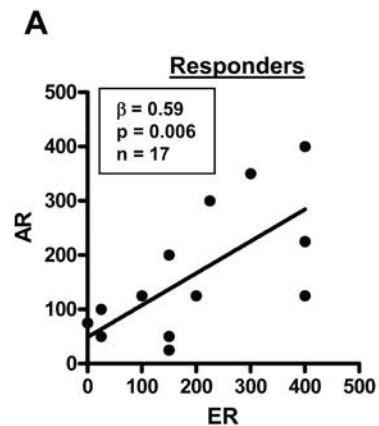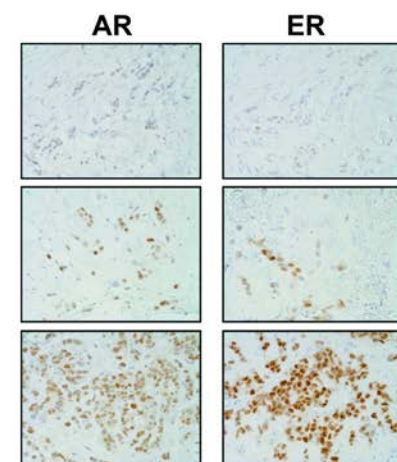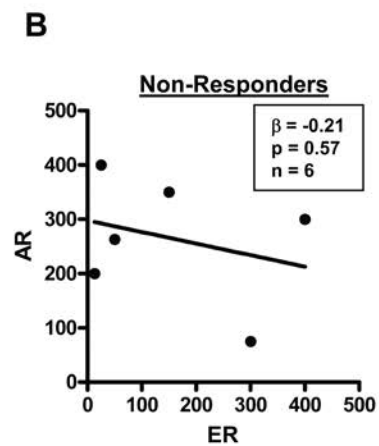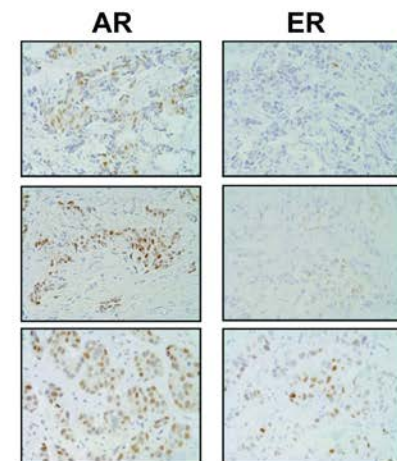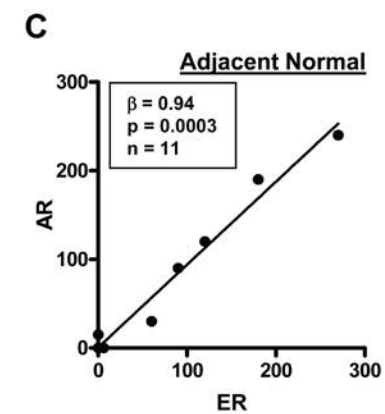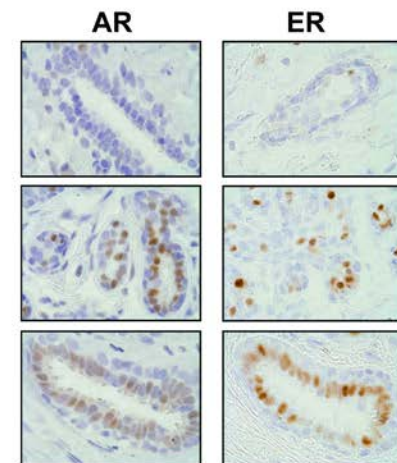

Supplemental Figure 1
